# Supplementary material for: Medulloblastoma Development in a Patient with a Constitutional Balanced t(5;22)(q35.1;q11.2) Involving the NF2 Gene
Source: PubMed Central journal article supplement — Case Rep Oncol. 2023 Feb 3;16(1):36–44. doi: 10.1159/000527564 (PMC9898807; doi:10.1159/000527564), 2023-02-03
Supplement: Supplementary_material-Suppl.3-s3.pdf [file Supplementary_material-Suppl.3-s3.pdf]

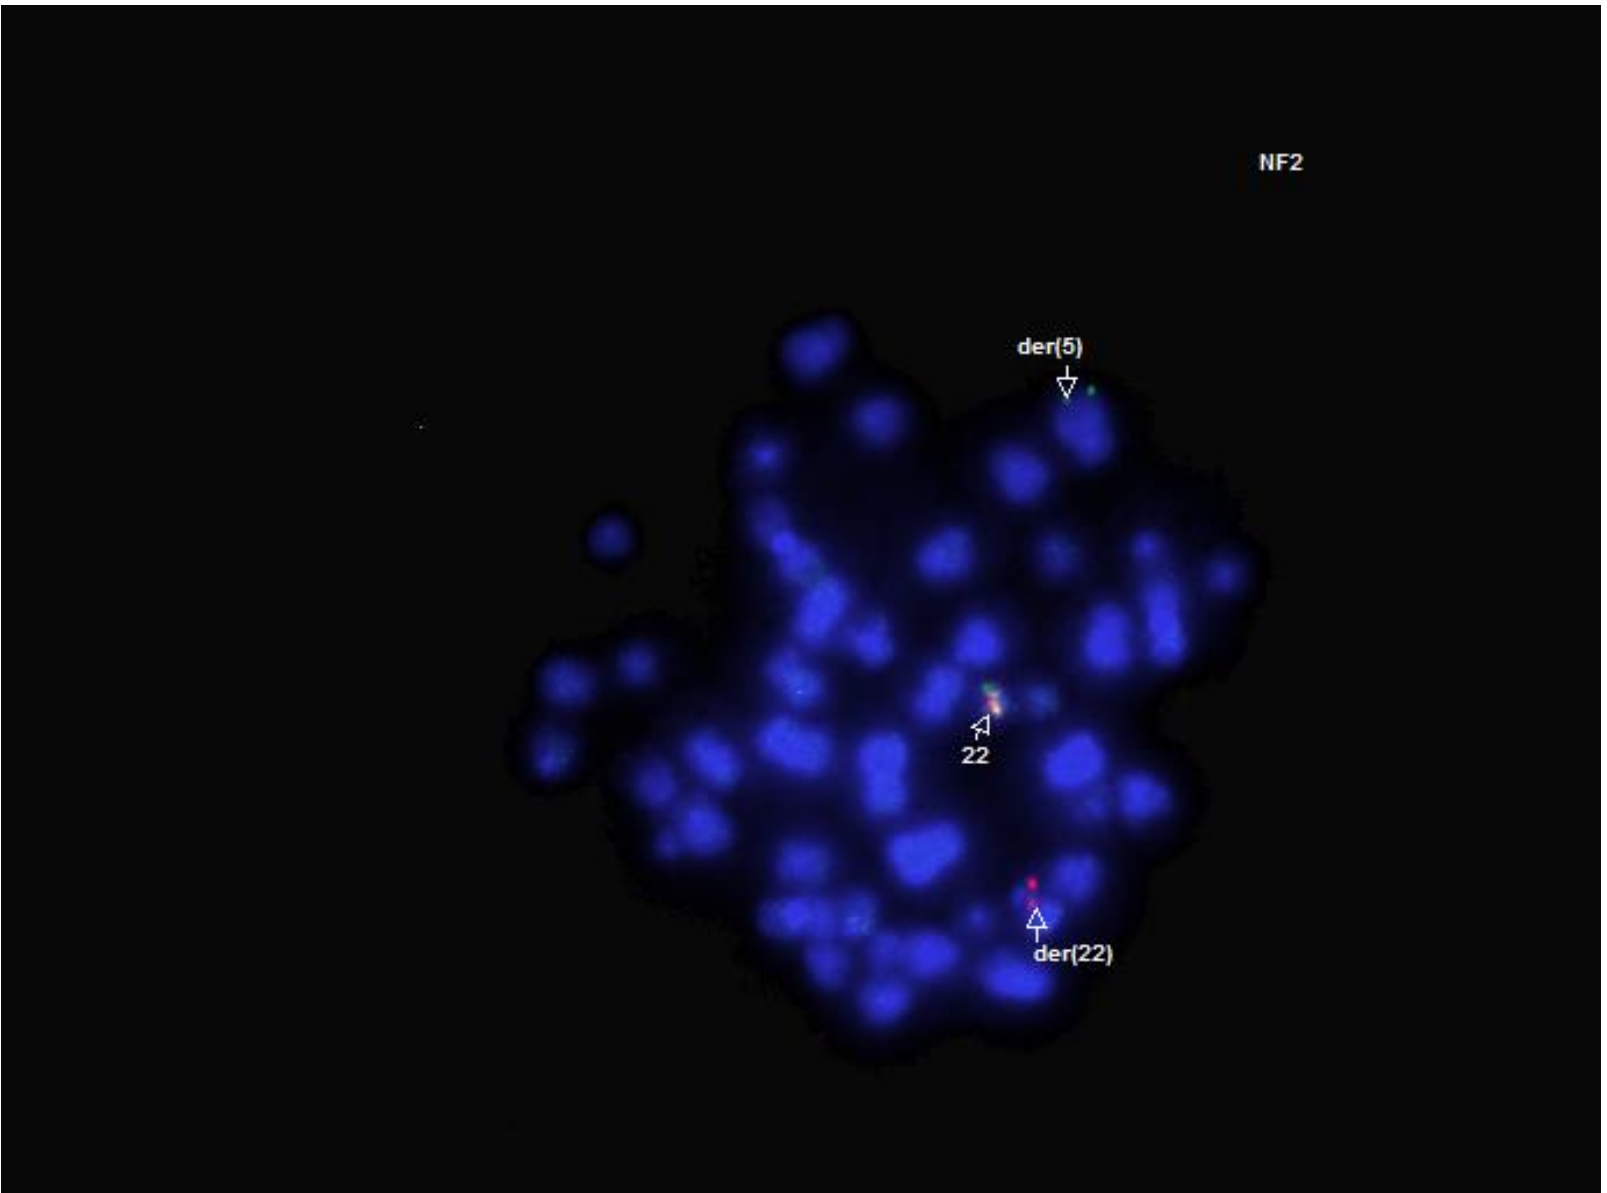

Supplementary Fig.2: Fish analysis with the NF2 Break Apart Probe in a bone marrow metaphase of the patient refractory AML sample
