# Supplementary figures and images for: Medulloblastoma Development in a Patient with a Constitutional Balanced t(5;22)(q35.1;q11.2) Involving the NF2 Gene
Source: PubMed Central journal article supplement — Case Rep Oncol. 2023 Feb 3;16(1):36–44. doi: 10.1159/000527564 (PMC9898807; doi:10.1159/000527564), 2023-02-03

cell average  
slide average  
0.5 1.0 1.5 2.0  
Conf.  
95%

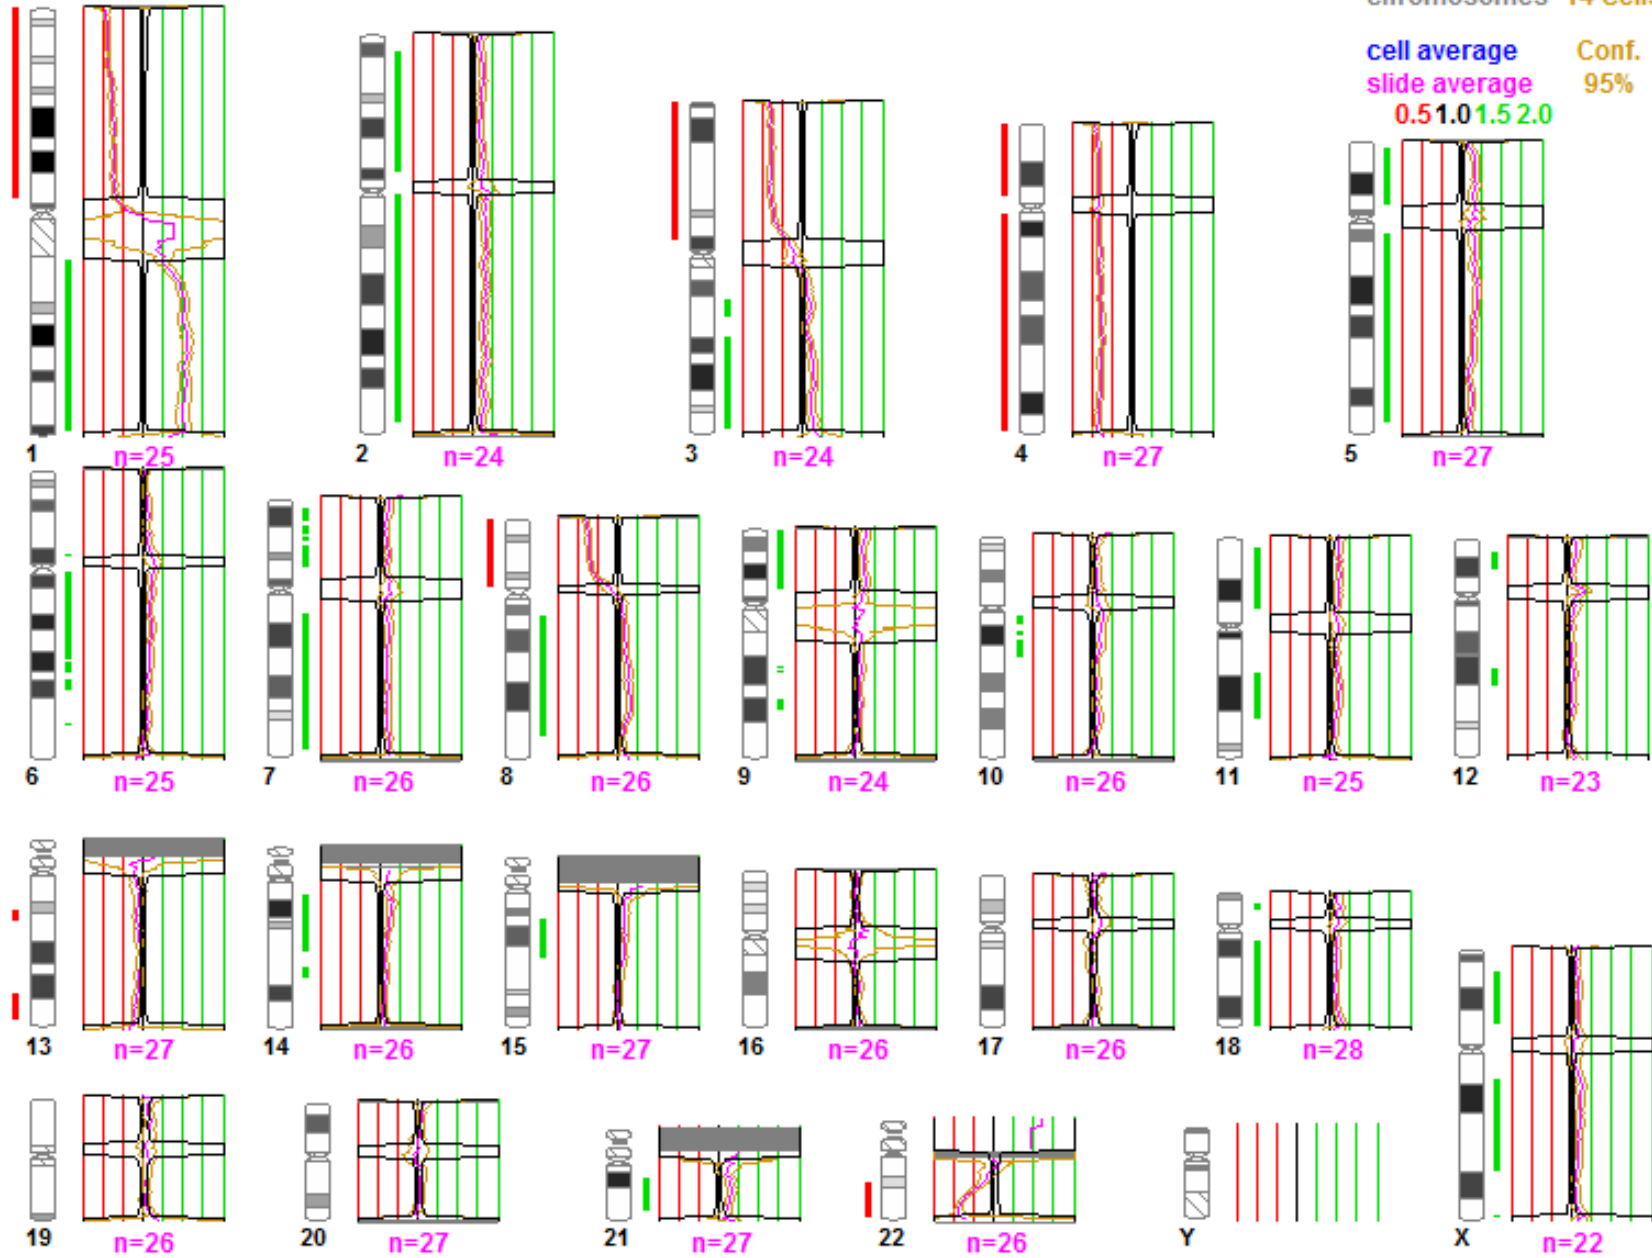

Supplementary Fig. 1: The tumour CGH profile.

Supplement: Supplementary_material-Suppl.2-s2.pdf [file Supplementary_material-Suppl.2-s2.pdf]
